# Supplementary material for: STAMBPL1 activates the GRHL3/HIF1A/VEGFA axis through interaction with FOXO1 to promote angiogenesis in triple-negative breast cancer
Source: eLife journal article supplement (doi:10.7554/elife.102433), 2024-11-22

Figure 7-figure supplement 1A:

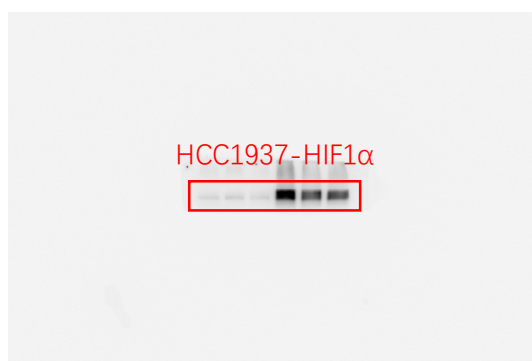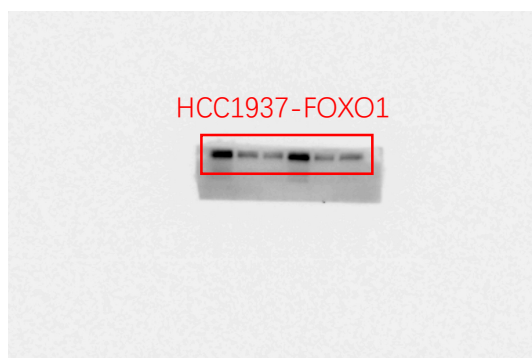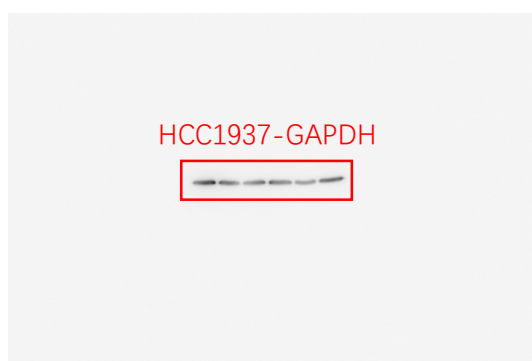

Figure 7-figure supplement 1E:

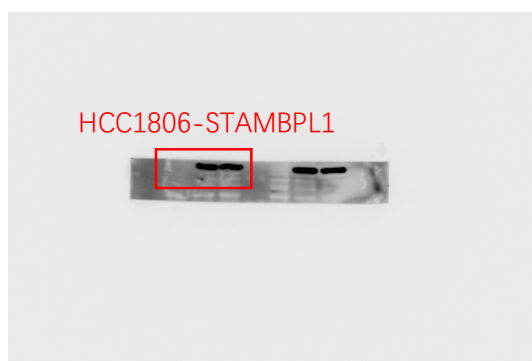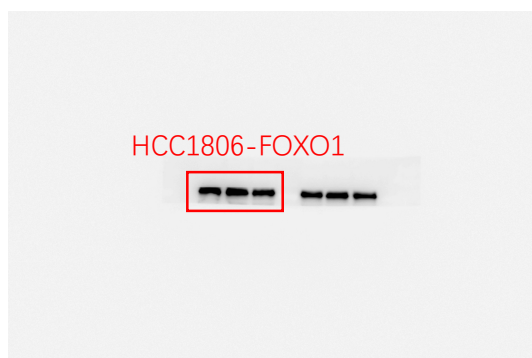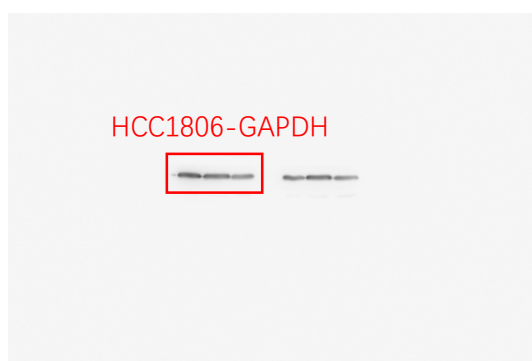

Figure 7-figure supplement 1:

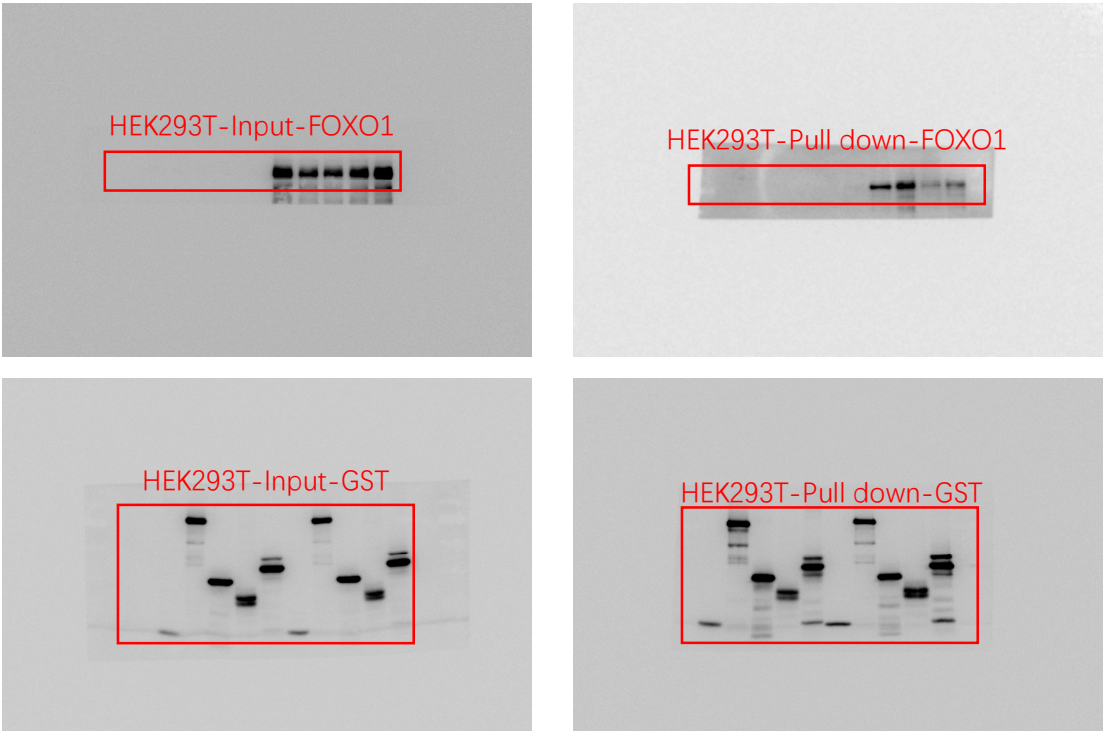

Figure 7-figure supplement 1J:

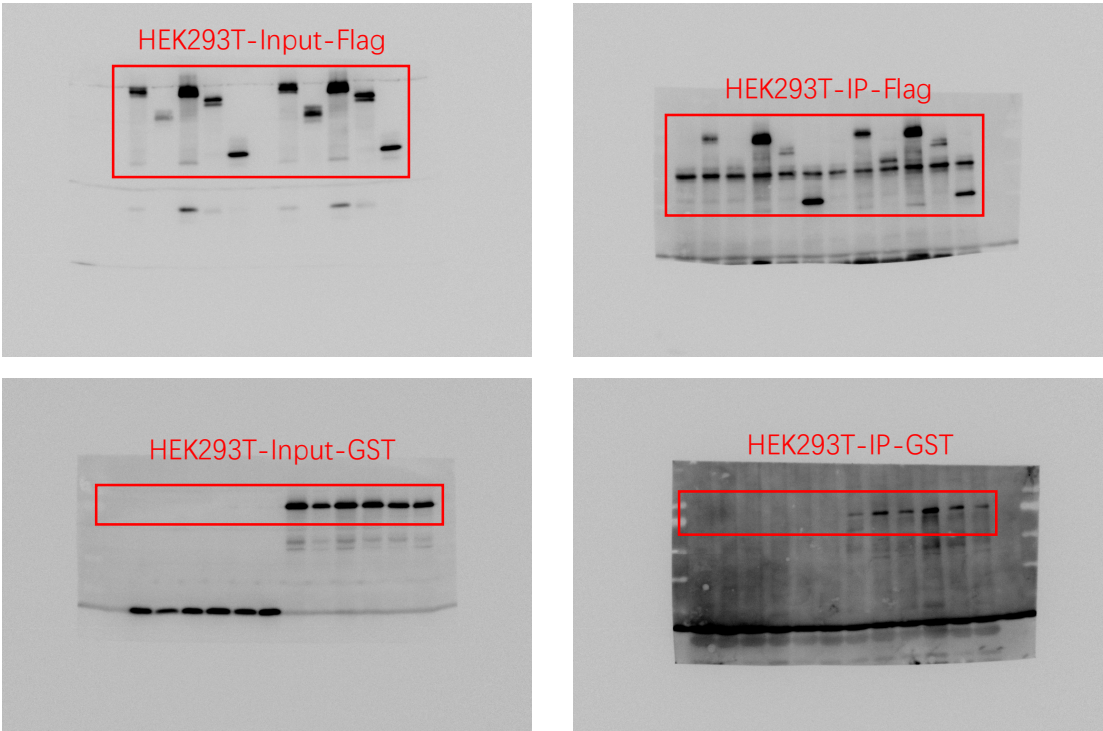

Supplement: fig7-figsupp1-data1 [file elife-102433-fig7-figsupp1-data1-v1.zip]
