# Supplementary figures and images for: STAMBPL1 activates the GRHL3/HIF1A/VEGFA axis through interaction with FOXO1 to promote angiogenesis in triple-negative breast cancer
Source: eLife journal article supplement (doi:10.7554/elife.102433), 2024-11-22

Figure 1A:

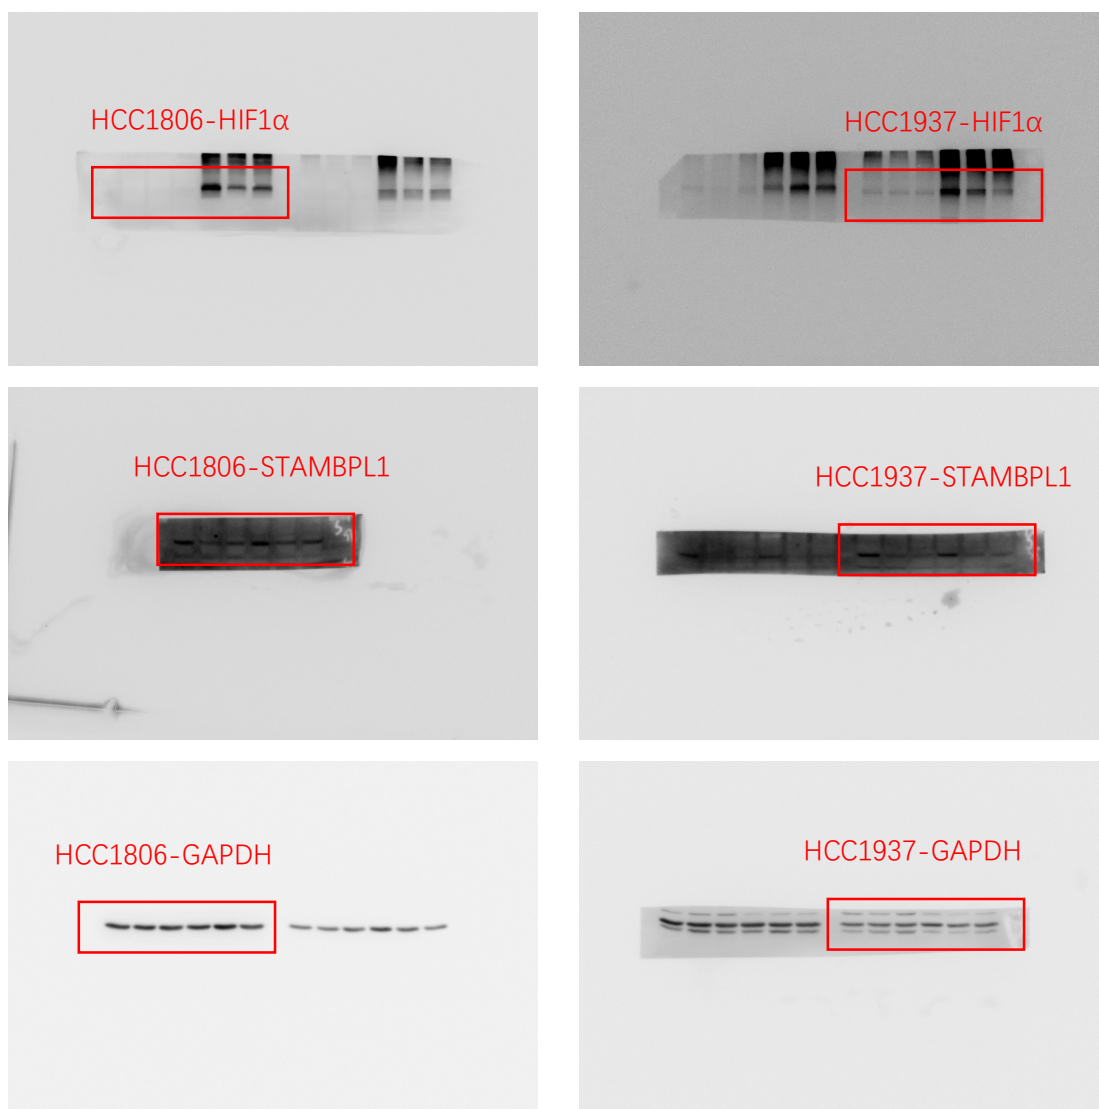

Figure 1F:

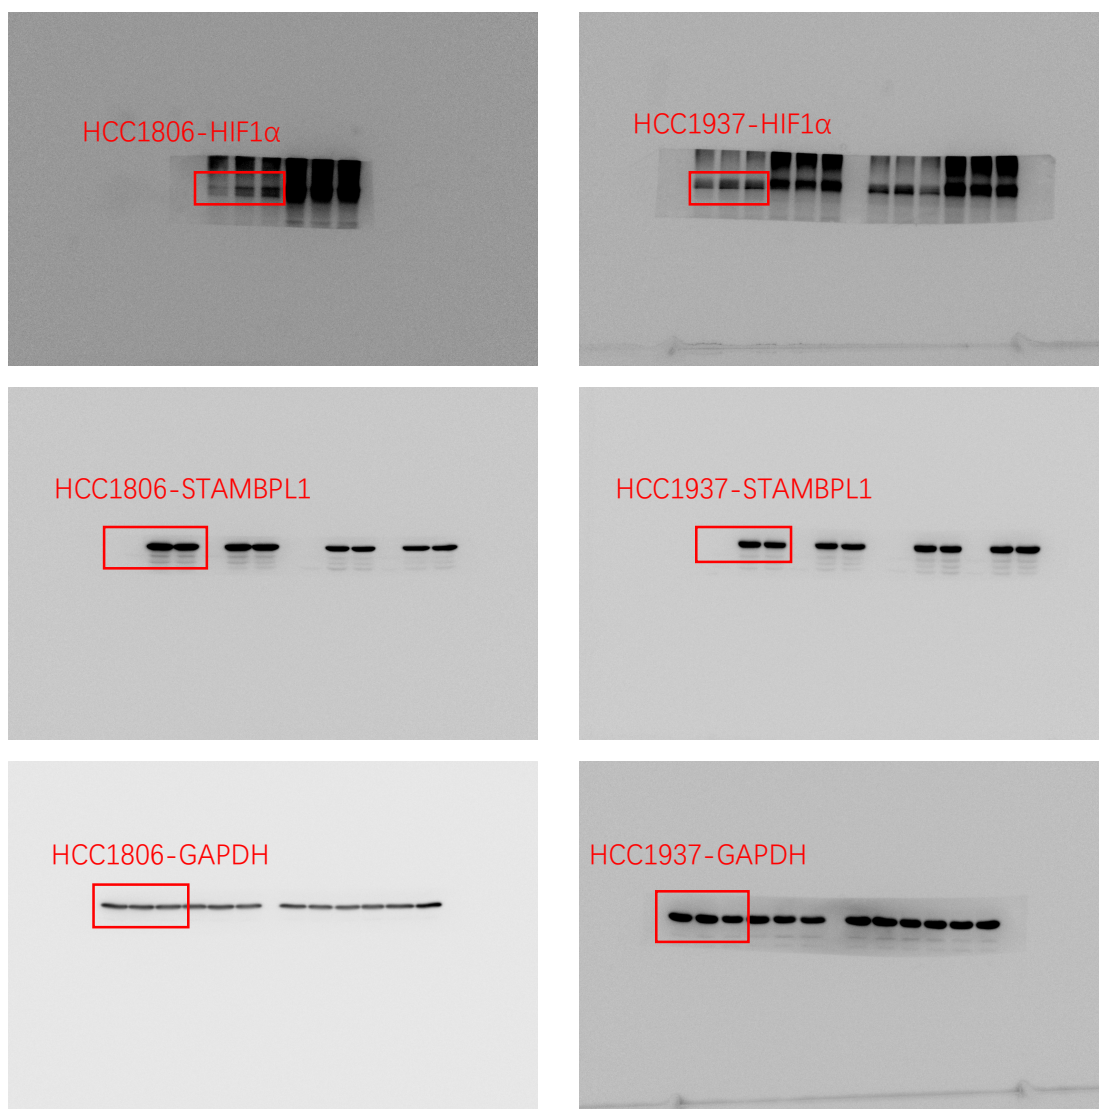

Supplement: fig1-data1 [file elife-102433-fig1-data1-v1.zip]

Figure 2A:

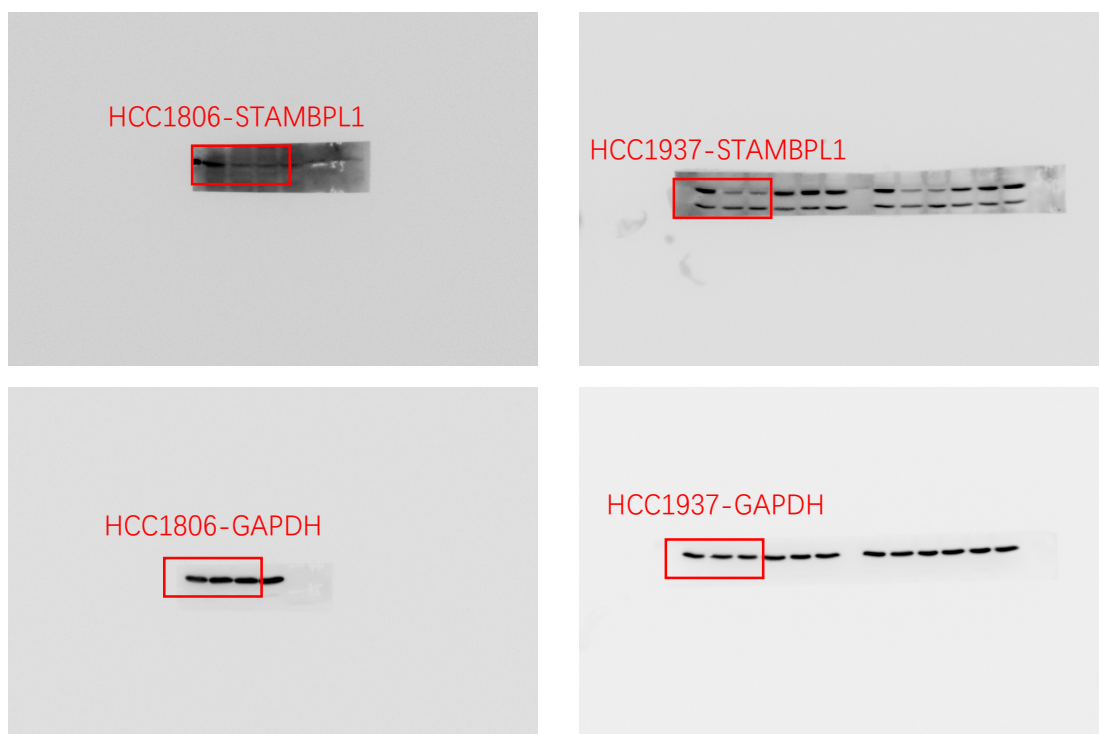

Figure 2D:

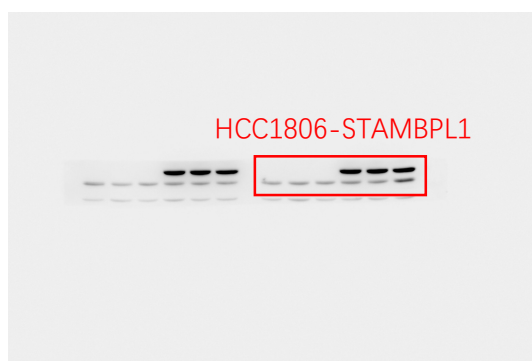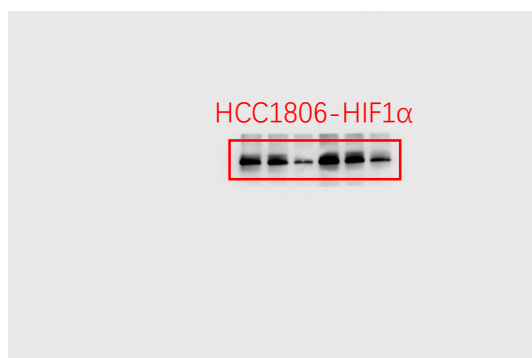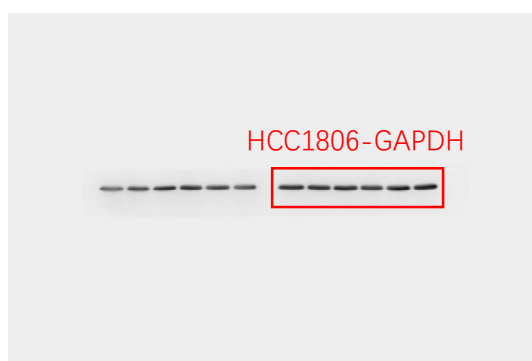

Figure 2F:

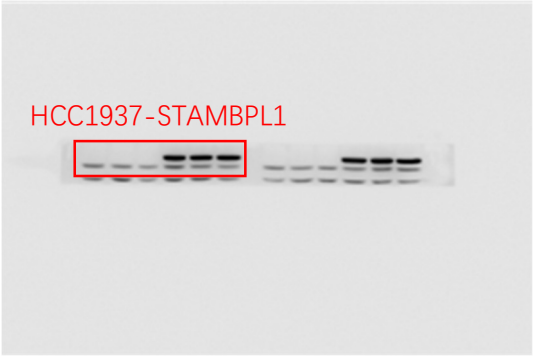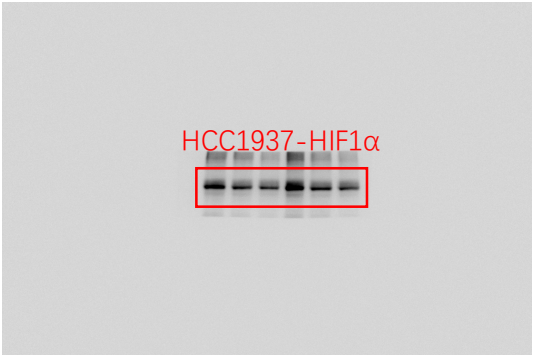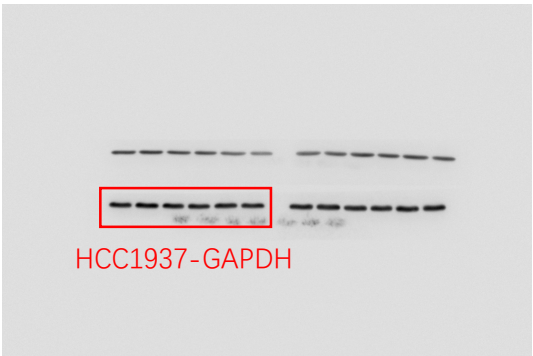

Supplement: fig2-data1 [file elife-102433-fig2-data1-v1.zip]

Figure 4C:

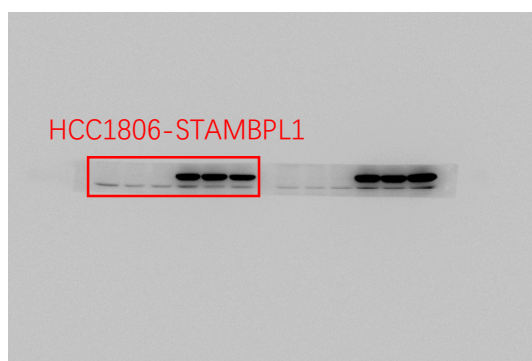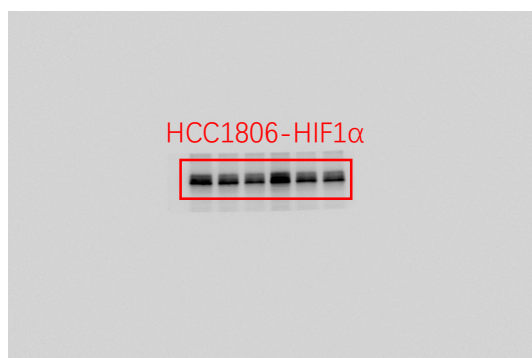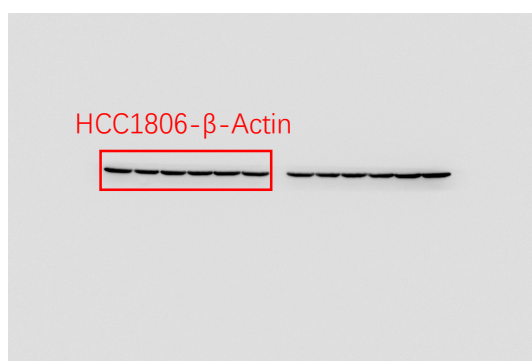

Supplement: fig4-data1 [file elife-102433-fig4-data1-v1.zip]

Figure 4-figure supplement 1C:

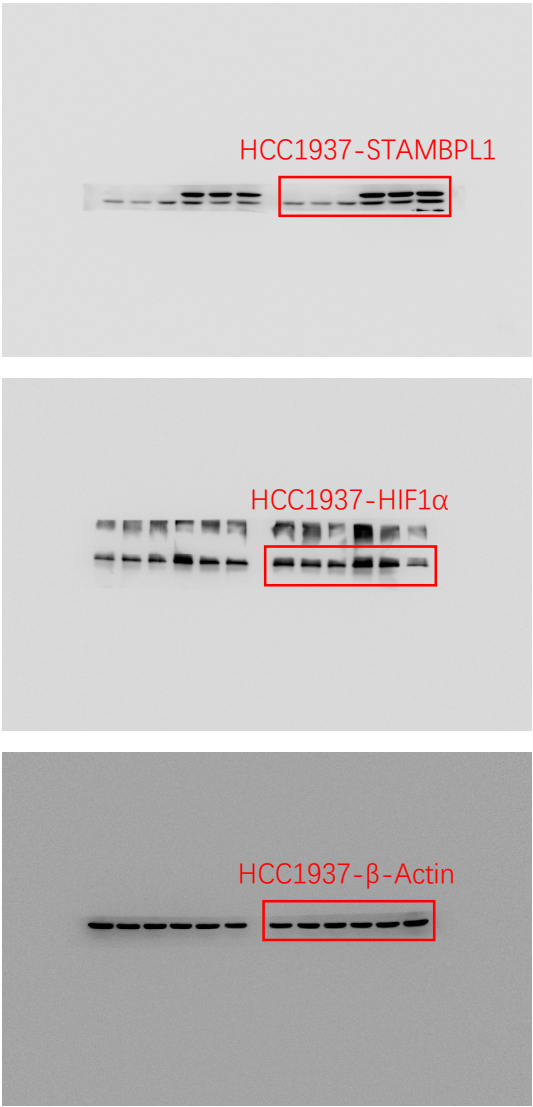

Supplement: fig4-figsupp1-data1 [file elife-102433-fig4-figsupp1-data1-v1.zip]

Figure 5C:

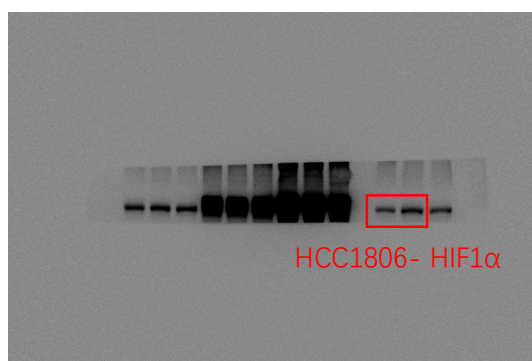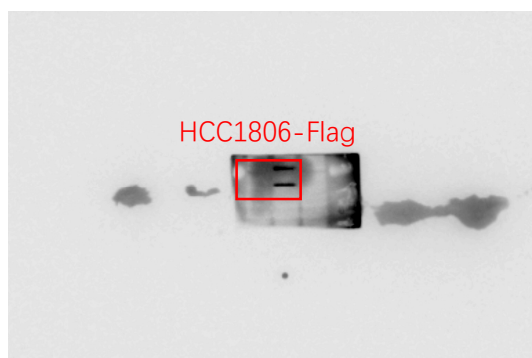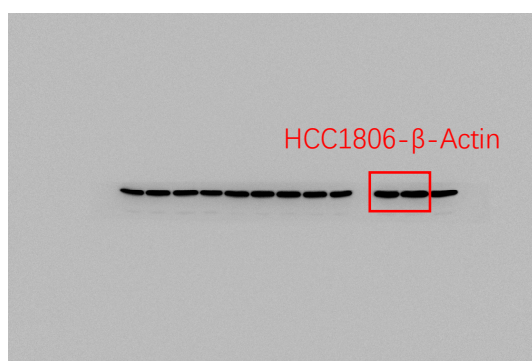

Figure 5D:

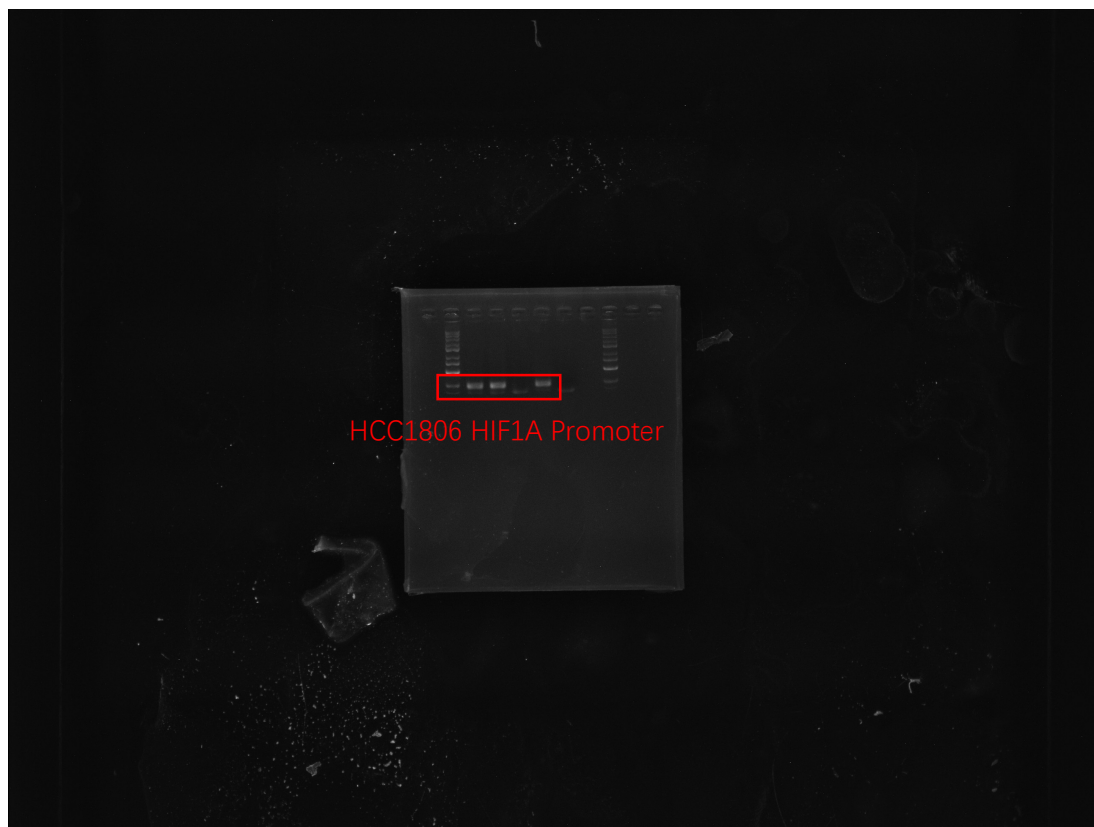

Figure 5F:

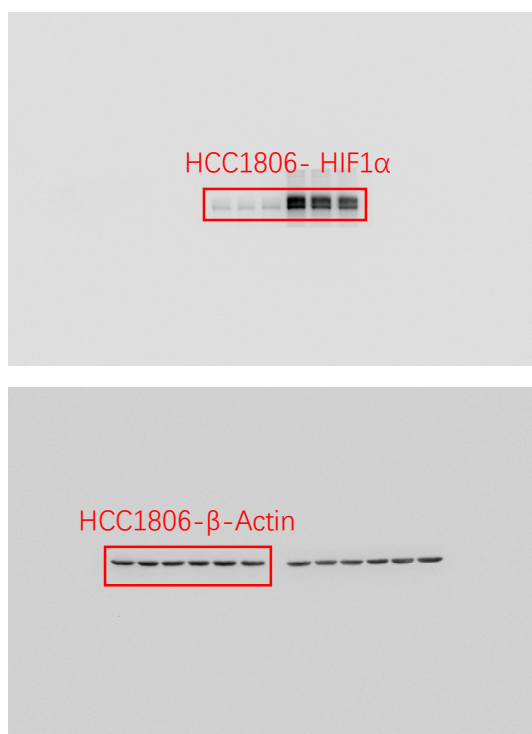

Supplement: fig5-data1 [file elife-102433-fig5-data1-v1.zip]

Figure 5-figure supplement 1A:

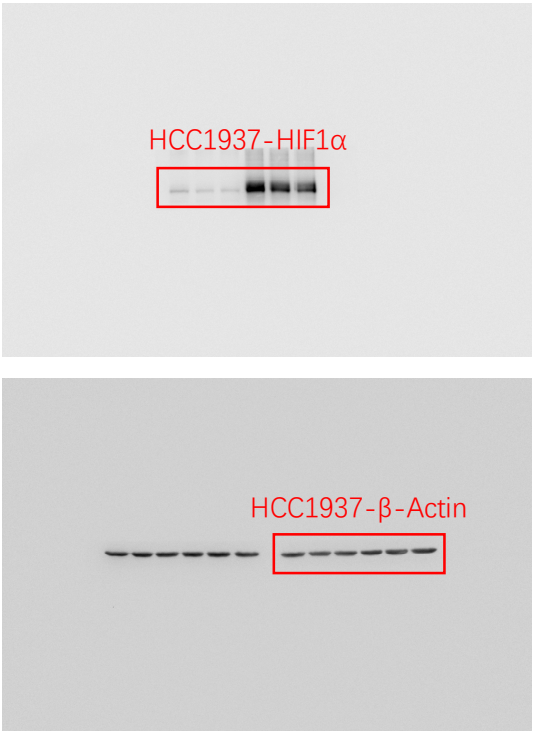

Supplement: fig5-figsupp1-data1 [file elife-102433-fig5-figsupp1-data1-v1.zip]

Figure 6A:

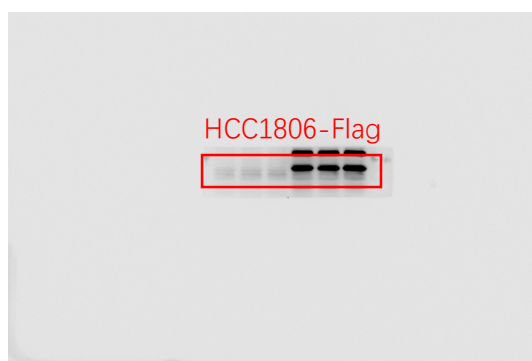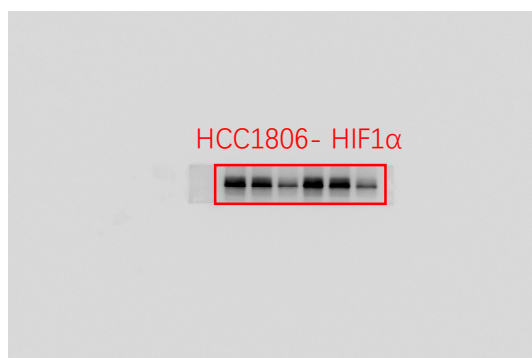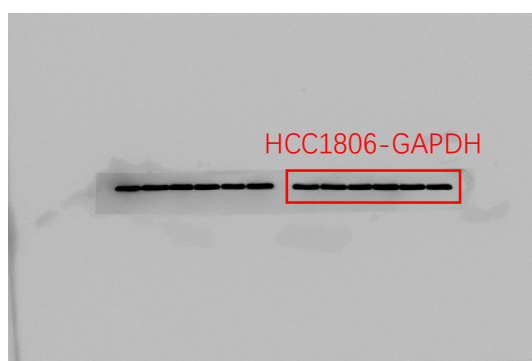

Supplement: fig6-data1 [file elife-102433-fig6-data1-v1.zip]

Figure 6-figure supplement 1A:

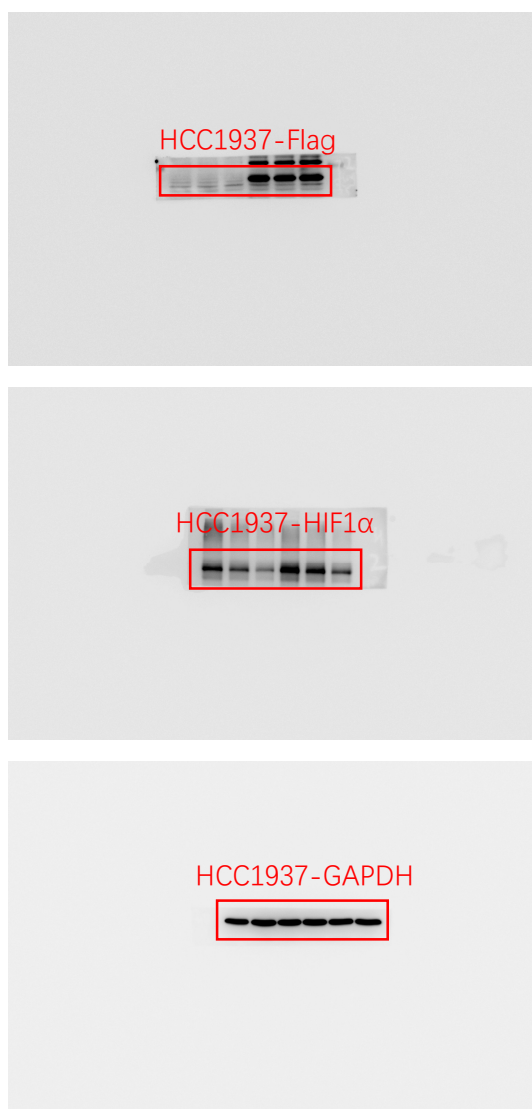

Supplement: fig6-figsupp1-data1 [file elife-102433-fig6-figsupp1-data1-v1.zip]

Figure 7A:

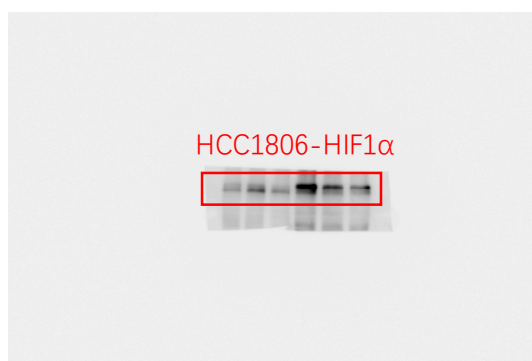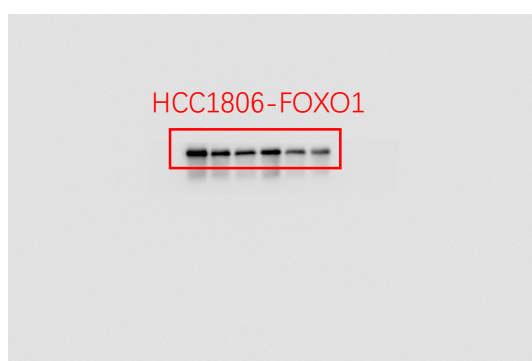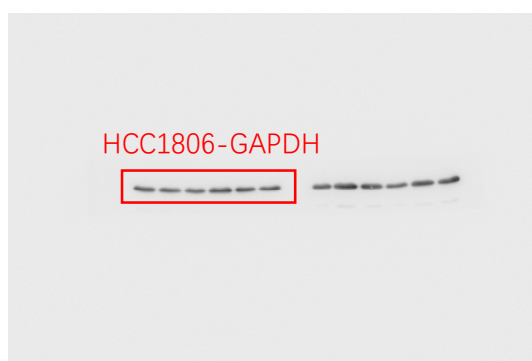

Figure 7E:

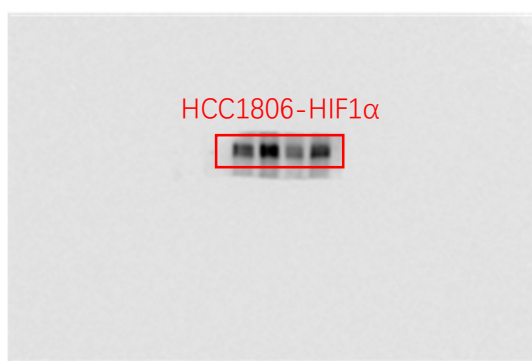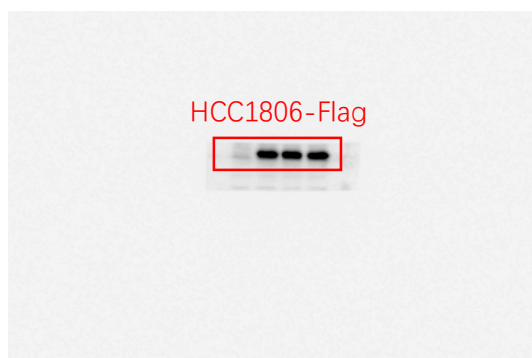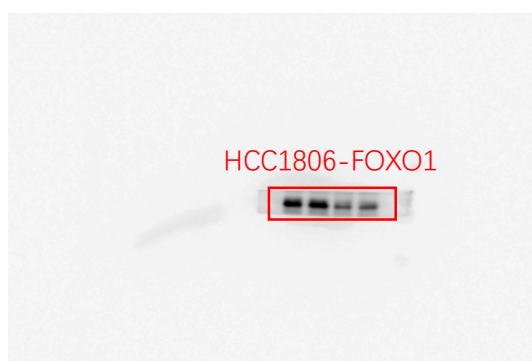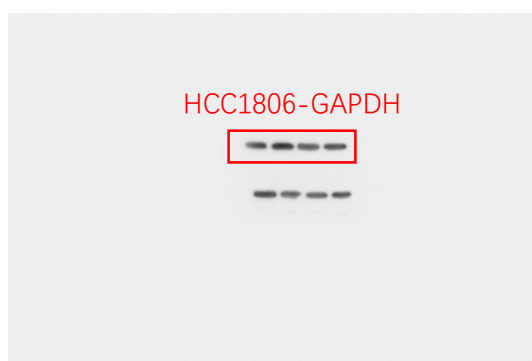

Figure 7I:

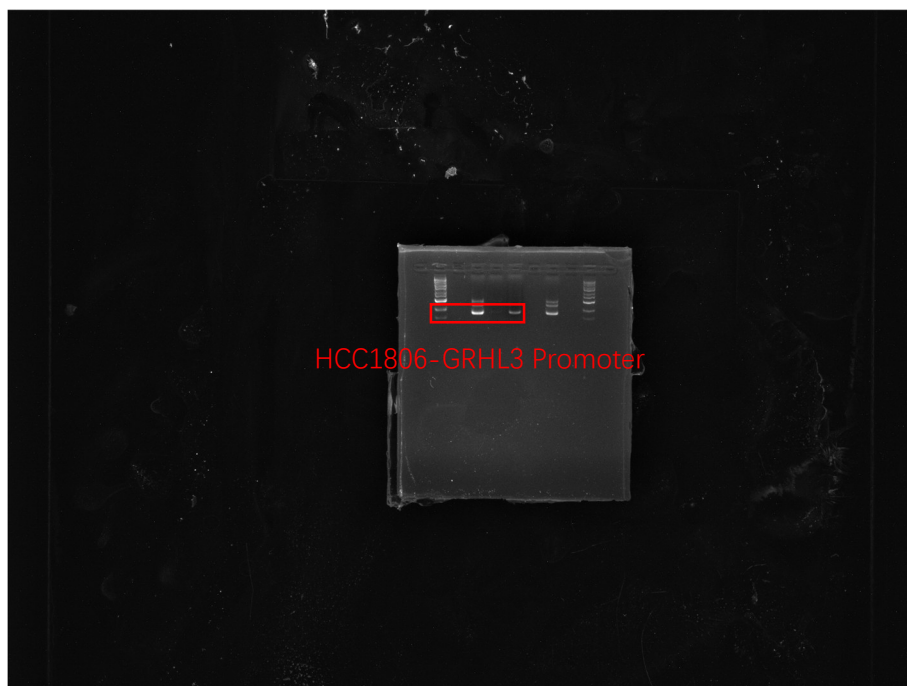

Figure 7L:

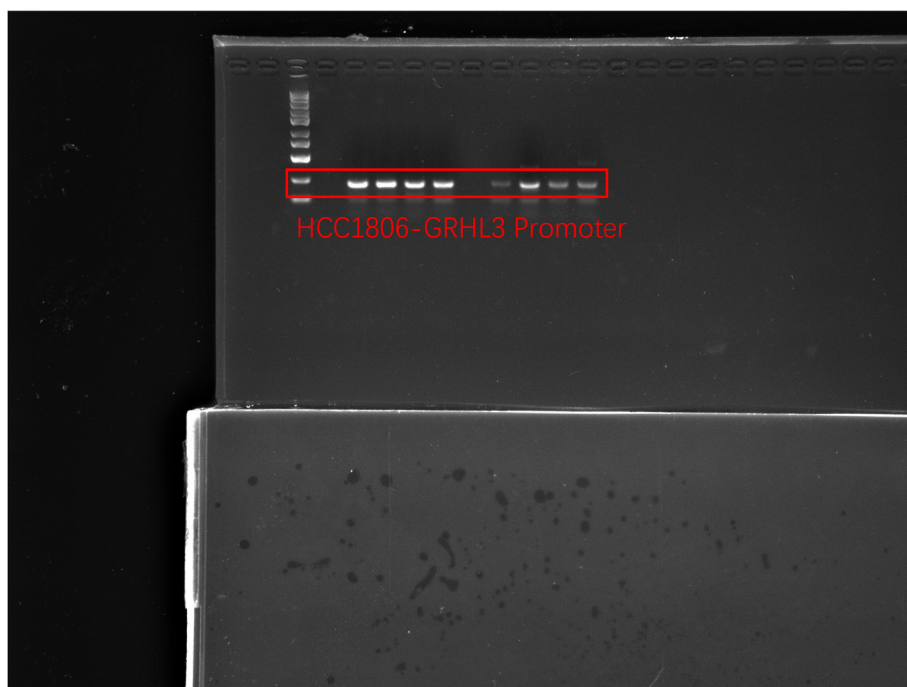

**Figure 7N:**

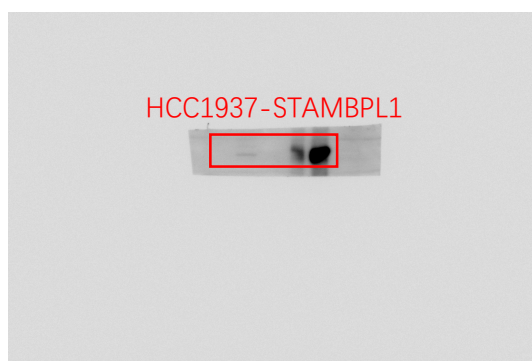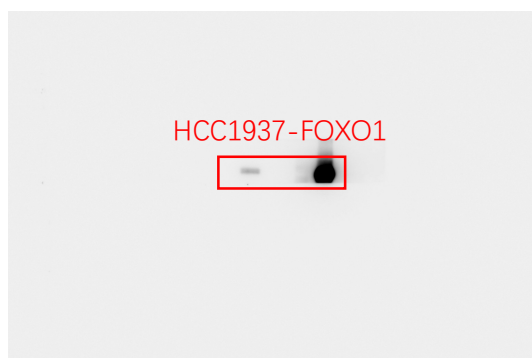

Supplement: fig7-data1 [file elife-102433-fig7-data1-v1.zip]

**Figure 8D:**

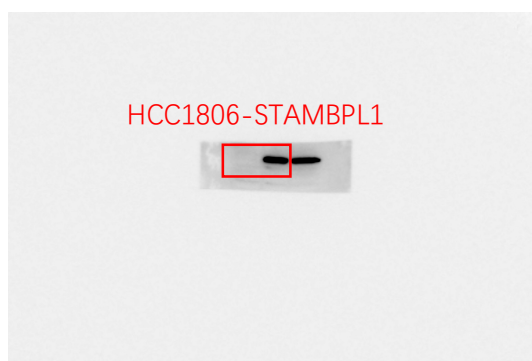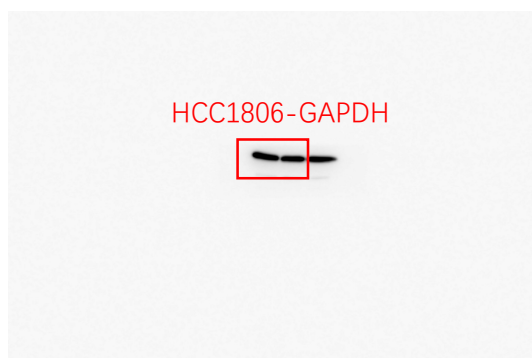

Supplement: fig8-data1 [file elife-102433-fig8-data1-v1.zip]
